# Supplementary material
Source: PubMed Central journal article supplement (PMC4846560)
Supplement: NIHMS759068-supplement-2.pdf [file NIHMS759068-supplement-2.pdf]

| Ferritin coupling location                       | Other features  | Survival | Calcium imaging |
|--------------------------------------------------|-----------------|----------|-----------------|
| C-terminus ( $\Delta$ 760-871)                   | N/A             | Yes      | Yes             |
| N-terminus ( $\Delta$ 1-201)                     | N/A             | Yes      | No              |
| C-terminus (full channel)                        | N/A             | Yes      | No              |
| S4/5 loop:<br>YFTRGLKLTG...ferritin...YSIMIQKILF | "Arg" linker 1X | No       |                 |
|                                                  | "Gly" linker 1X | No       |                 |
|                                                  | "Arg" linker 2X | No       |                 |
|                                                  | "Gly" linker 2X | No       |                 |
|                                                  | "Arg" linker 3X | No       |                 |
|                                                  | "Gly" linker 3X | No       |                 |
|                                                  | "Arg" linker 4X | No       |                 |
|                                                  | "Gly" linker 4X | No       |                 |
|                                                  | "Arg" linker 5X | No       |                 |
|                                                  | "Gly" linker 5X | No       |                 |
|                                                  | "Arg" linker 6X | No       |                 |
|                                                  | "Gly" linker 6X | No       |                 |
|                                                  | "Arg" linker 7X | No       |                 |
|                                                  | "Gly" linker 7X | No       |                 |
|                                                  | "Arg" linker 8X | No       |                 |
|                                                  | "Gly" linker 8X | No       |                 |
|                                                  | "Arg" linker 9X | No       |                 |
|                                                  | "Gly" linker 9X | No       |                 |

**\*Arg linker: TRPV4-RRLLSGCP...ferritin...RPRERRRRLRR-TRPV4**

**\*Gly linker: TRPV4-RRLLSGCP...ferritin...RGGGGGSGGY-TRPV4**

### Supplementary Table 1: Description of TRPV4-ferritin fusion proteins tested

For insertions into the TRPV4 S4-S5 intracellular loop, the amino acid sequence of TRPV4 precedes and succeeds the intervening ferritin protein in the “ferritin coupling location” column. “Arg” and “Gly” are separate linkers used to expand the S4/S5 intracellular loop where ferritin was inserted and refer to the predominant amino acids expressed on the C-terminus of ferritin reconnecting to the S5 transmembrane domain of TRPV4. Specific amino acid sequences for the linkers used to expand the S4-S5 intracellular loop are shown at the bottom, which were sequentially inserted (e.g. 1X, 2X, 3X, etc.). The “Survival” column indicates whether cells survived following transfection as measured by expression of the mCherry gene under control of an IRES cassette. The “Calcium imaging” column refers to whether calcium transients were detectable following stimulation with magnetic fields.
